# Supplementary material
Source: Springer Nature journal article supplement (https://www.springermedizin.de/resource/supplementary/12986_2009_191_MOESM4_ESM.pdf/25655558)

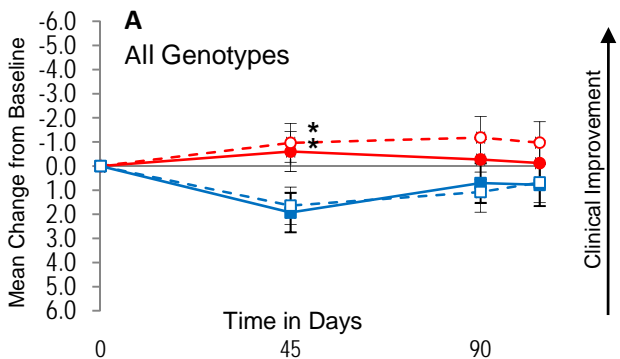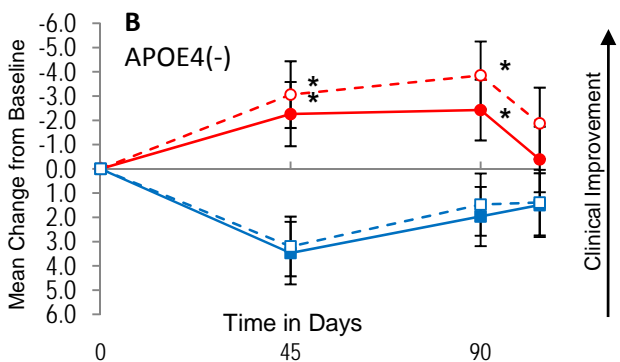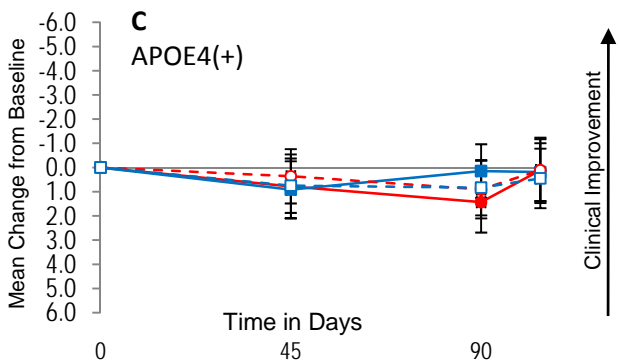

■ Placebo per protocol    □ Placebo dosage compliant  
● AC-1202 per protocol    ○ AC-1202 dosage compliant

Supplement: MOESM4 [file 25655558]
